# Supplementary material
Source: PubMed Central journal article supplement (PMC2077028)

**F**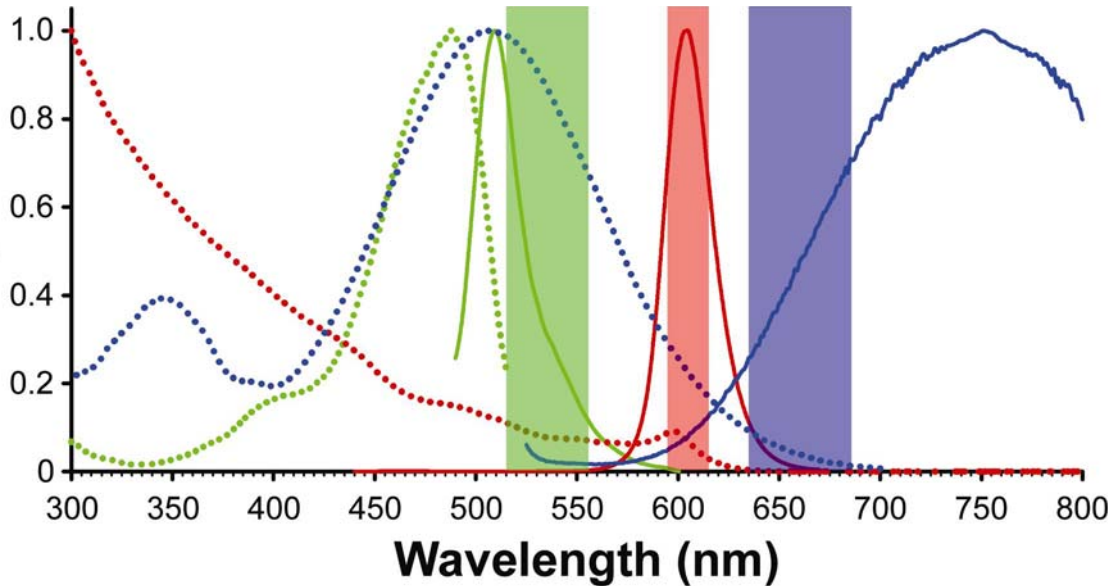

Supplement: pnas_0706906104_1.pdf [file pnas_0706906104_1.pdf]

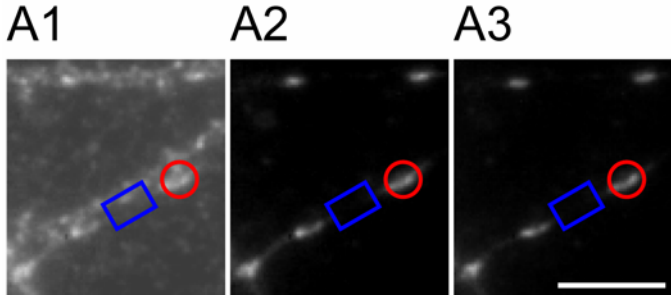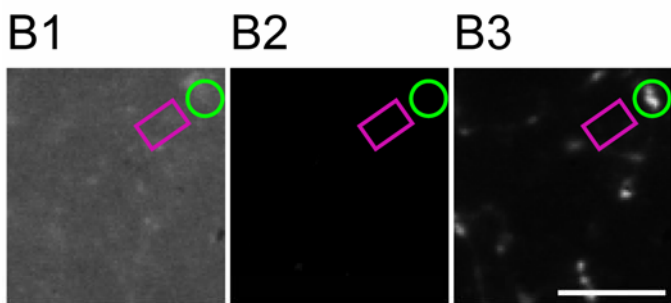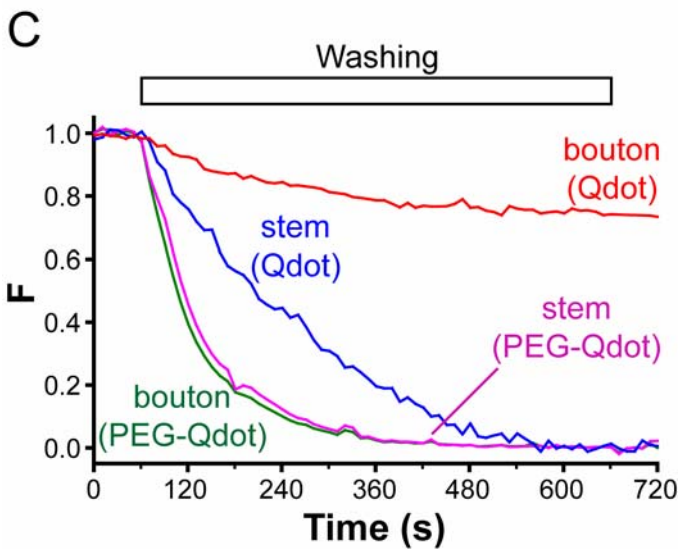

Supplement: pnas_0706906104_2.pdf [file pnas_0706906104_2.pdf]

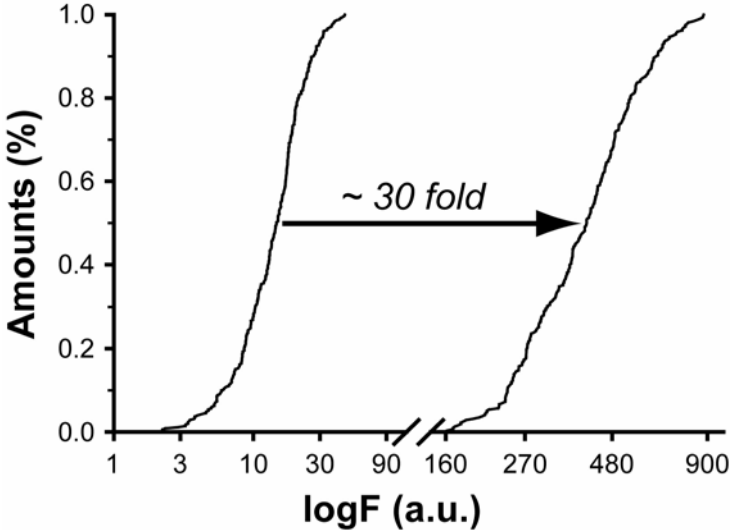

Supplement: pnas_0706906104_3.pdf [file pnas_0706906104_3.pdf]
